# Supplementary material for: Goulphar: rapid access and expertise for standard two-color microarray normalization methods
Source: PubMed Central journal article supplement (PMC1626094; doi:10.1186/1471-2105-7-467), 2006-10-23

## Normalisation report for yeast\_slide.gpr

GPR file = yeast\_slide.gpr

Foreground = median foreground

Flags = remove -50 -75 -100

Background = no background subtraction

Saturating spot filter = saturating spot threshold = 60000

Spot diameter filter= No spot diameter filter

Normalisation type = global lowess followed by a block median normalisation

Graphical output= in pdf report

**Red (Cy5) background intensity including filtered spots**

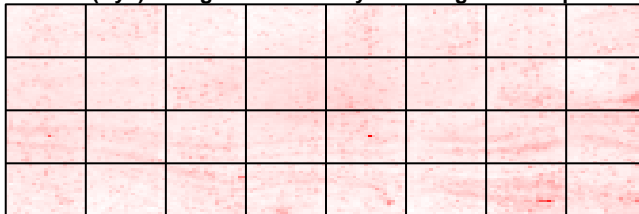

**Red (Cy5) background intensity excluding filtered spots**

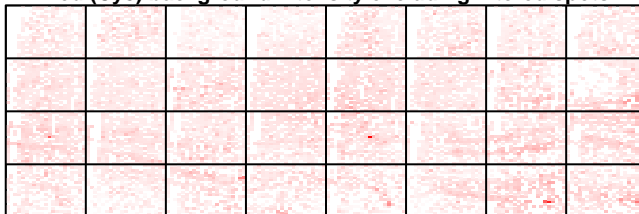

**Green (Cy3) background intensity including filtered spots**

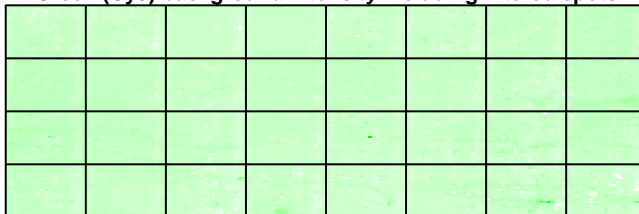

**Green (Cy3) background intensity excluding filtered spots**

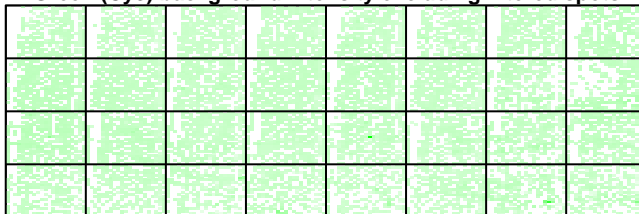

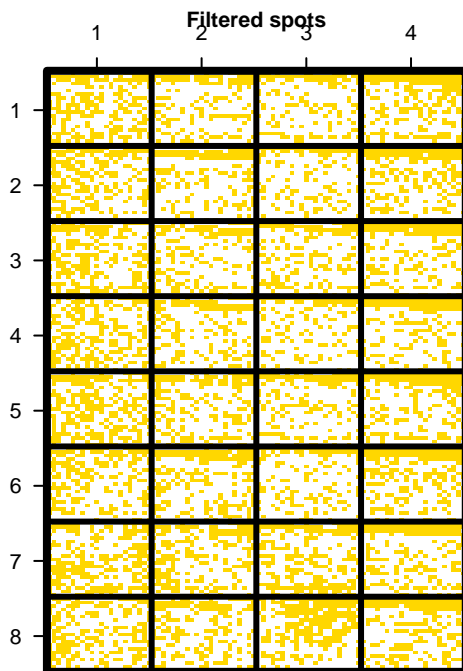

**MA-plot before normalisation  
(excluding filtered spots)**

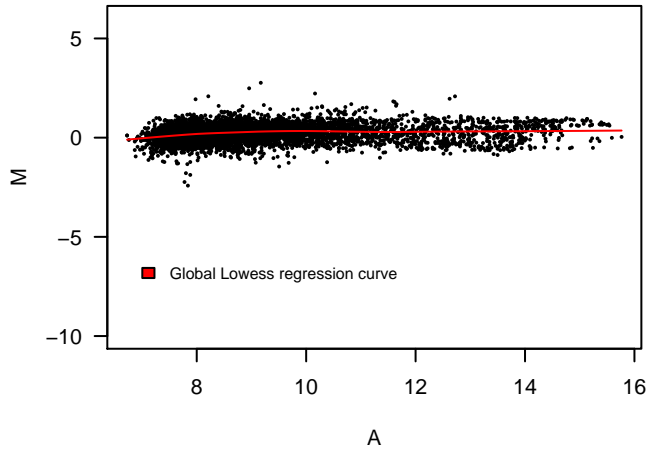

**MA-plot after global lowess normalisation  
(excluding filtered spots)**

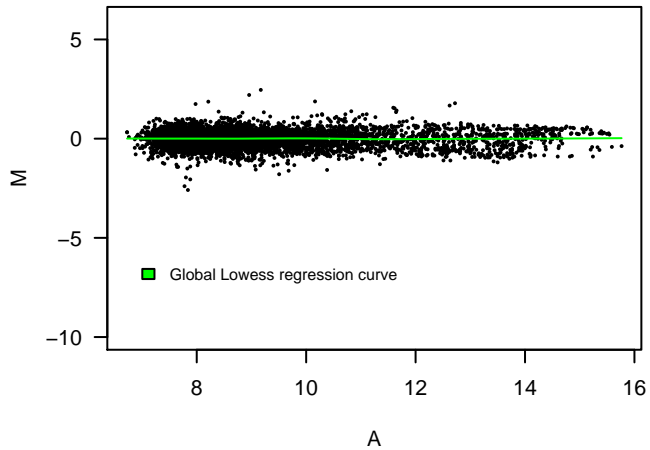

MA-plot after printtip median normalisation  
(excluding filtered spots)

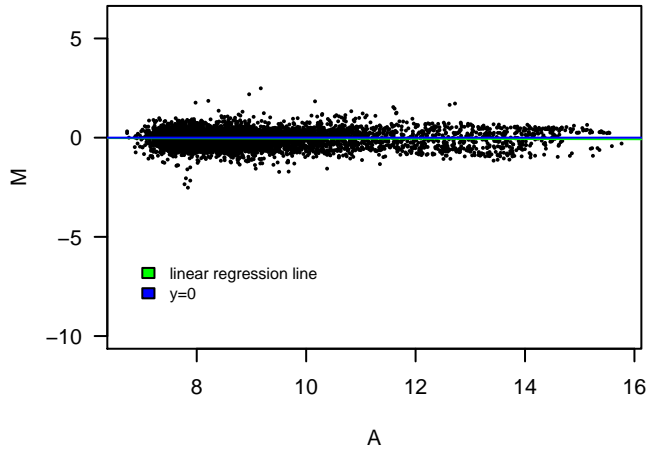

**Boxplot of printtip groups before normalisation  
(excluding filtered spots)**

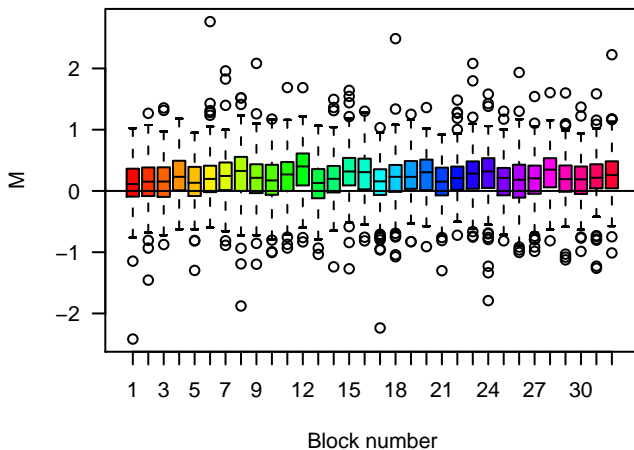

**Boxplot of printtip group after global lowess normalisation  
(excluding filtered spots)**

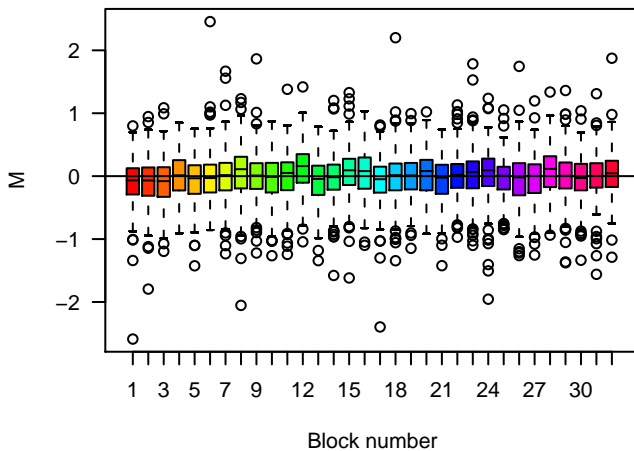

**Boxplot of printtip group after printtip median normalisation  
(excluding filtered spots)**

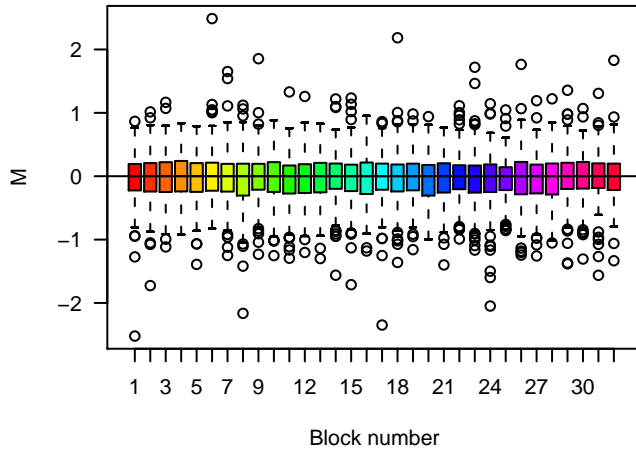

**RG densities**

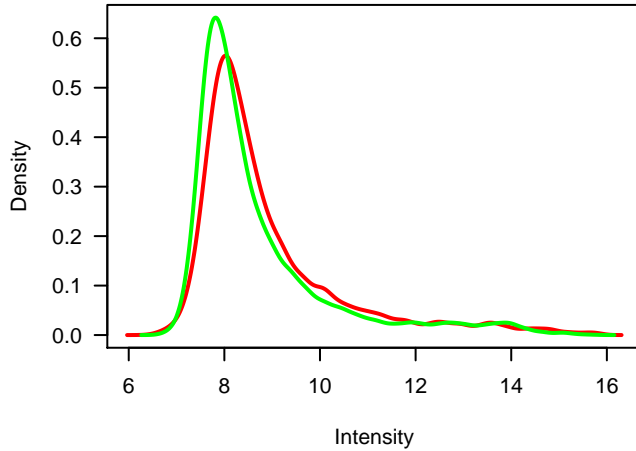

**RG densities**

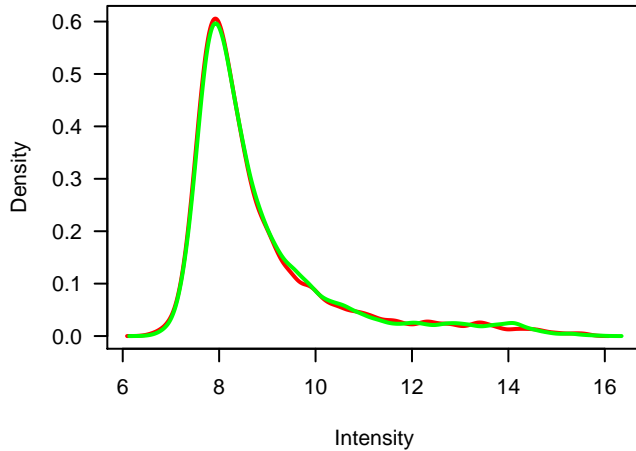



**M density, before normalisation**

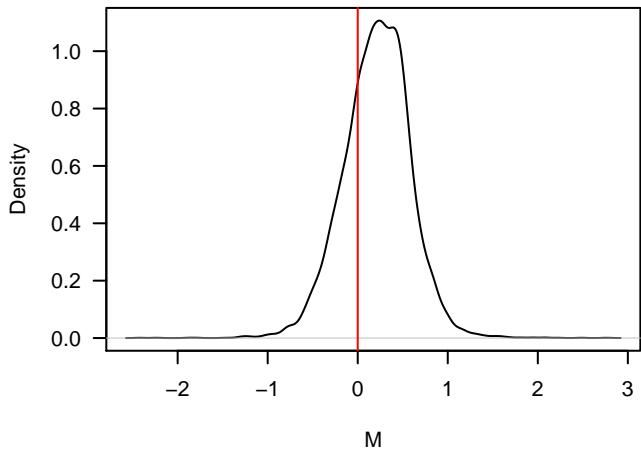

**M density, after normalisation**

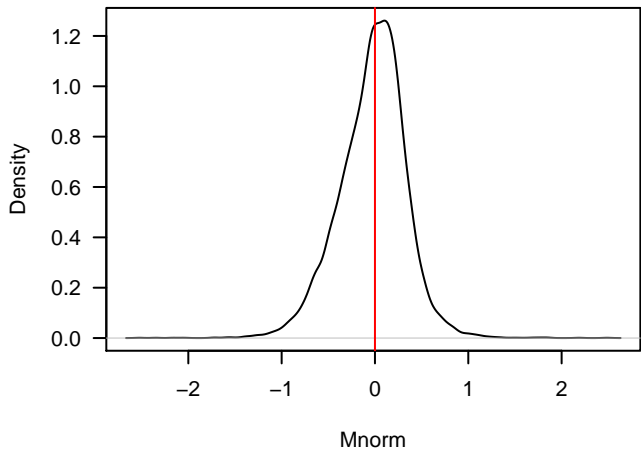

M plot excluding filtered spots

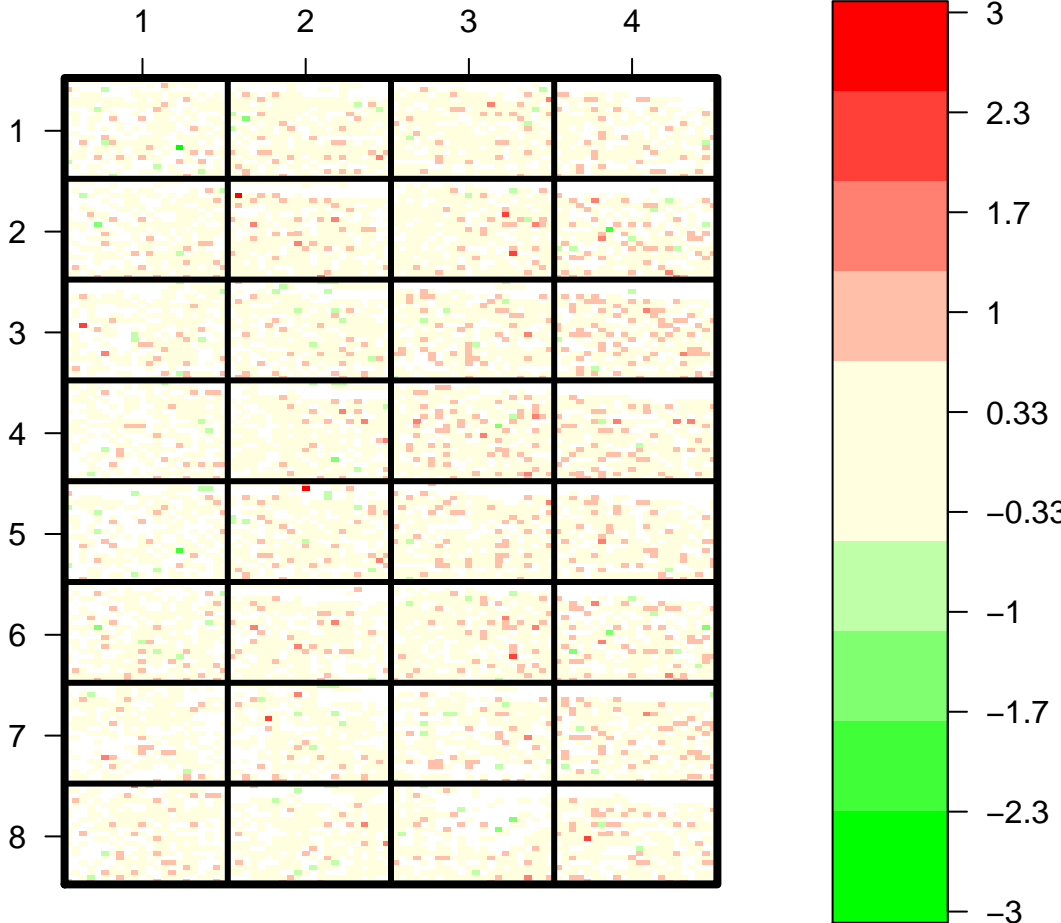

**M map after global lowess (spots filtered)**

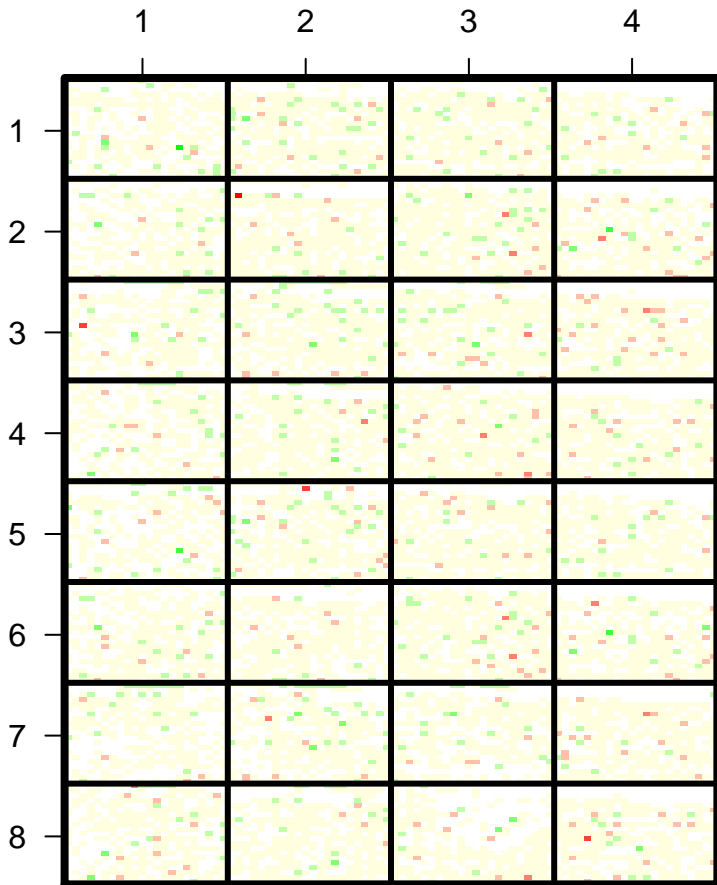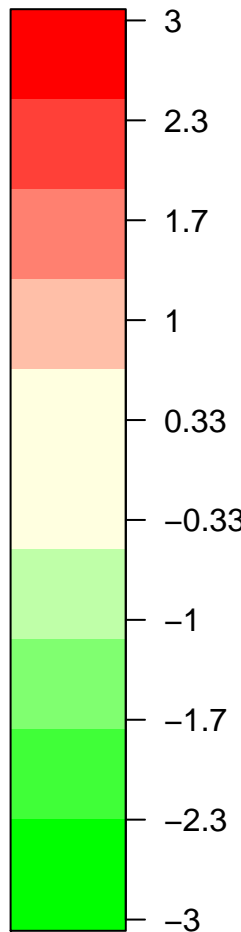

Final M normalized map (spots filtered)

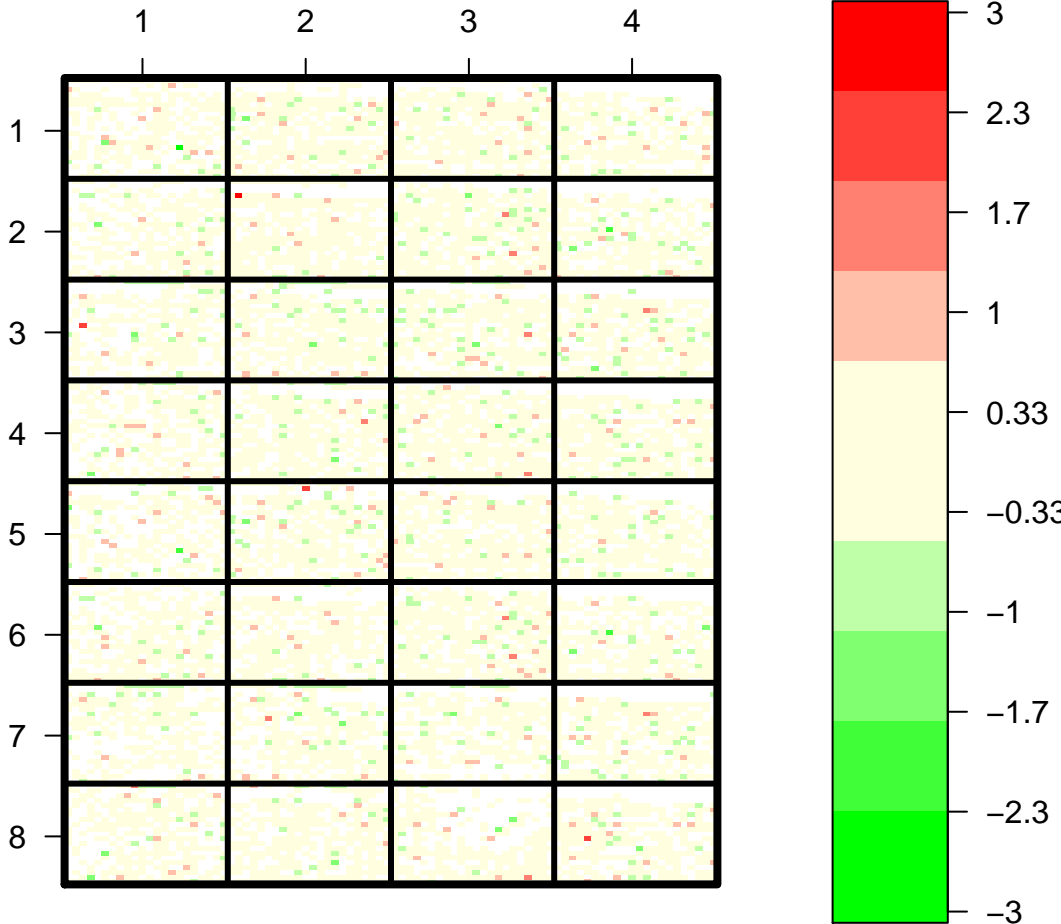

**A plot excluding filtered spots**

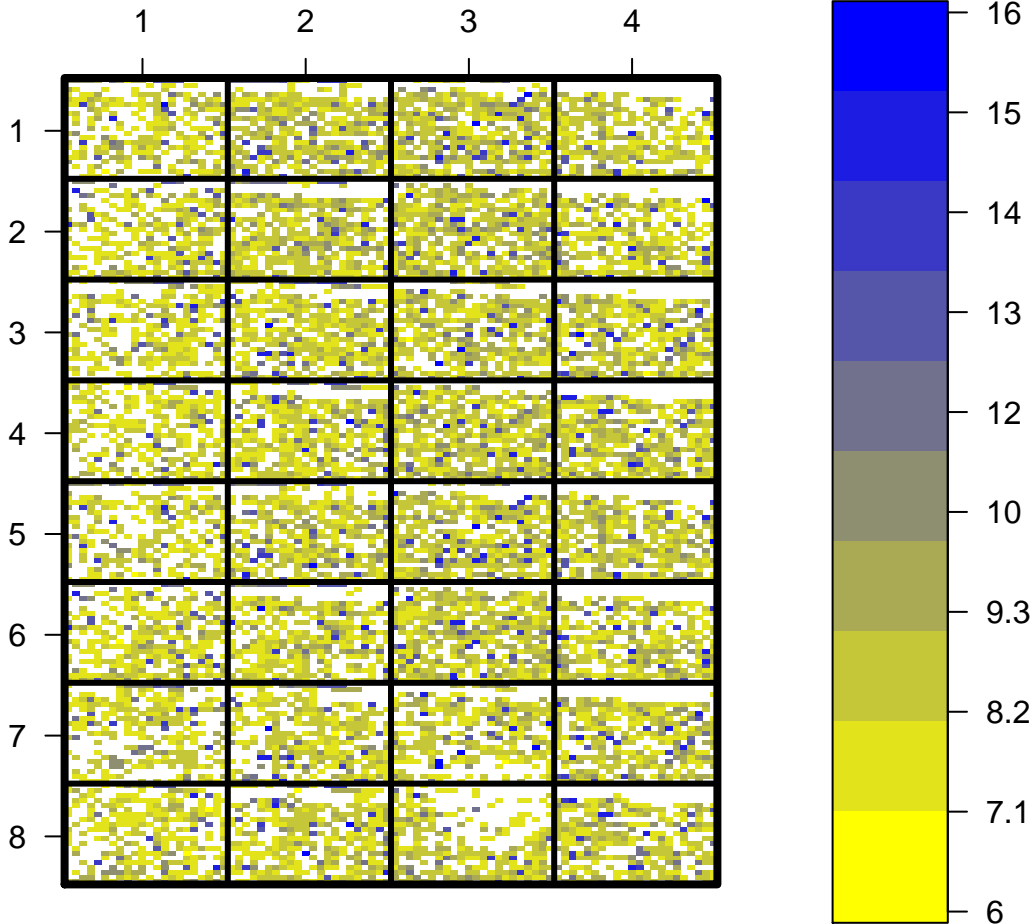

Supplement: 1471-2105-7-467-S3.pdf [file 1471-2105-7-467-S3.pdf]
