# Supplementary material for: Goulphar: rapid access and expertise for standard two-color microarray normalization methods
Source: PubMed Central journal article supplement (PMC1626094; doi:10.1186/1471-2105-7-467), 2006-10-23
Supplement: 1471-2105-7-467-S4.pdf [file 1471-2105-7-467-S4.pdf]

**Number of unfiltered spots in each block  
(alert if smaller than 200 )**

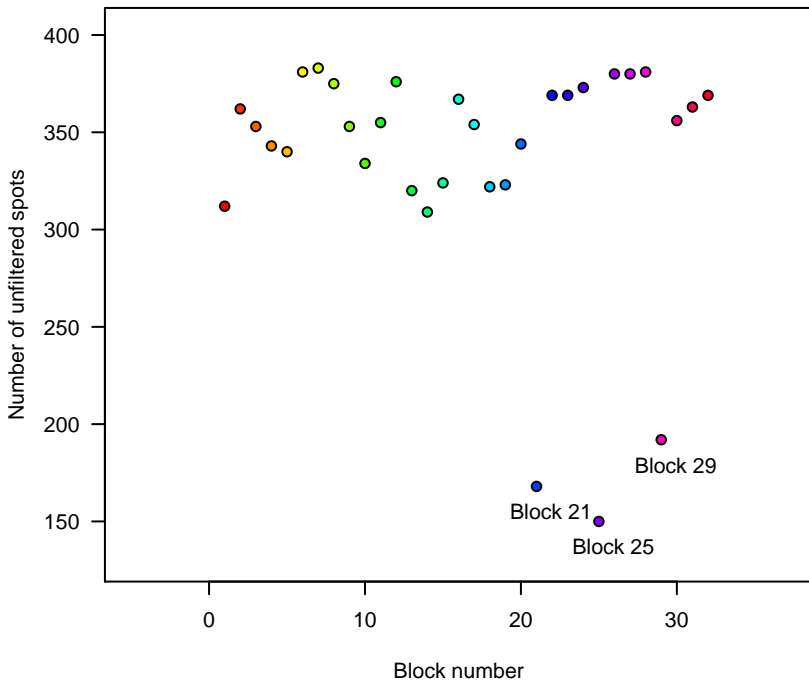

**Maximum number of spots in each block = 420**
